# Supplementary material for: The amount and timing of precipitation control the magnitude, seasonality and sources ( 14 C) of ecosystem respiration in a polar semi-desert, northwestern Greenland
Source: Copernicus journal article supplement (doi:10.5194/bg-11-4289-2014), 2014-08-19

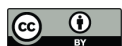

*Supplement of*

**The amount and timing of precipitation control the magnitude, seasonality and sources ( $^{14}\text{C}$ ) of ecosystem respiration in a polar semi-desert, northwestern Greenland**

**M. Lupascu et al.**

*Correspondence to:* M. Lupascu (mlupascu@uci.edu)

**Supplement Table 1:** Radiocarbon content of bulk carbon for the top 40 cm of soil under control and experimental treatments conditions (+2, +4°C, +4°C×W, W).

|                | Depth<br>cm | Bare<br>$\Delta^{14}\text{C}$ | Int.err | Depth<br>cm | Veget<br>$\Delta^{14}\text{C}$ | Int.err |
|----------------|-------------|-------------------------------|---------|-------------|--------------------------------|---------|
| <b>Control</b> | 0-5         | -345.4                        | 1.3     | 0-5         | 7.0                            | 1.4     |
|                | 10-15       | -695.5                        | 0.6     | 10-15       | -556.0                         | 0.7     |
|                | 20-25       | -806.9                        | 0.6     | 20-25       | -694.1                         | 0.8     |
|                | 30-36       | -889.7                        | 0.6     | 30-36       | -744.9                         | 0.6     |
| <b>+4°C</b>    | 0-5         | -331.7                        | 0.7     | 0-5         | -0.5                           | 1.2     |
|                | 10-15       | -715.8                        | 0.9     | 10-15       | -339.8                         | 0.7     |
|                | 20-24       | -772.3                        | 0.8     | 15-20       | -577.3                         | 0.7     |
|                | 31-35       | -774.1                        | 1.9     | 27-30       | -603.4                         | 0.7     |
| <b>+4°C×W</b>  | 0-5         | -114.8                        | 1.3     | 0-5         | -47.0                          | 1.4     |
|                | 19-25       | -823.5                        | 0.7     | 13-18       | -476.0                         | 0.9     |
|                | 29-35       | -919.0                        | 1.4     | 26-30       | -739.2                         | 0.7     |
| <b>W</b>       | 0-5         | -235.6                        | 1.0     | 0-5         | 49.8                           | 1.4     |
|                | 10-15       | -715.9                        | 0.7     | 10-15       | -408.5                         | 1.1     |
|                | 20-26       | -877.9                        | 0.6     | 20-25       | -780.0                         | 0.7     |
|                | 33-36       | -816.4                        | 0.6     | 32-36       | -909.0                         | 0.5     |

**Supplement Figure 1:** Time series of monthly precipitation at Thule airport (THU) weather station after applying a 13-month running mean.

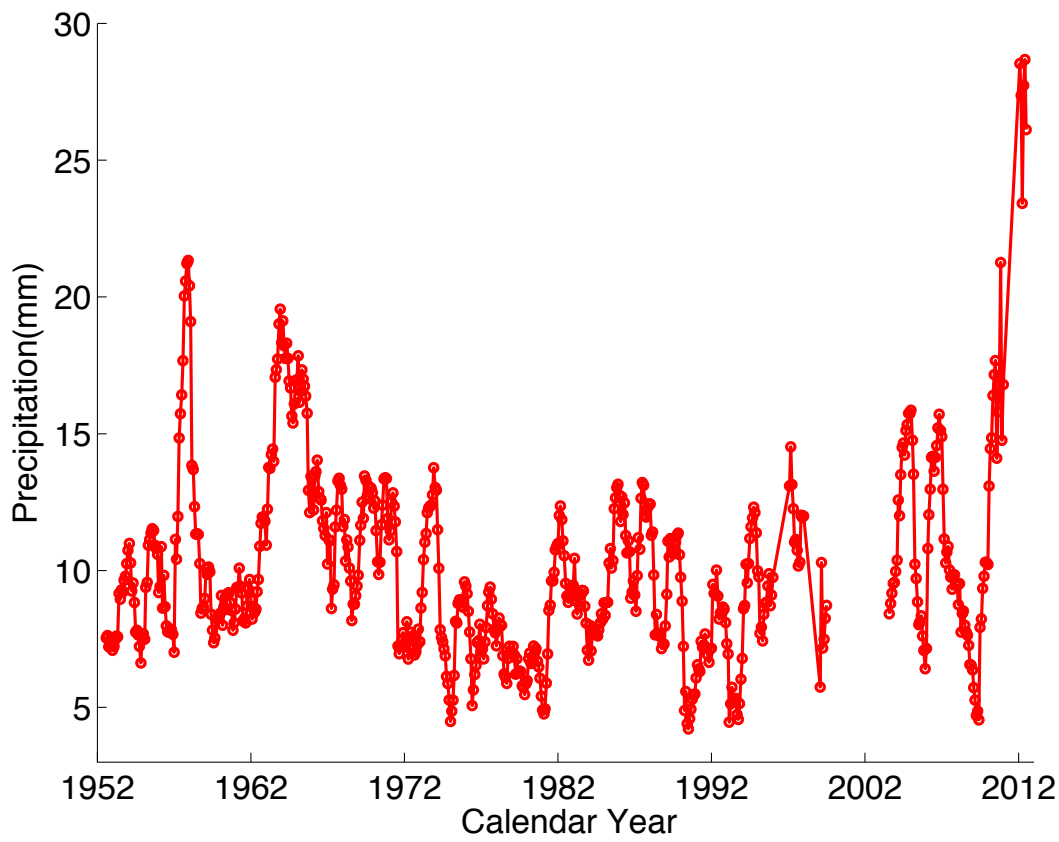

**Supplement Figure 2:** The July air temperature series (blue line) and their 5 year running means (red line) from Thule airport (THU) weather station.

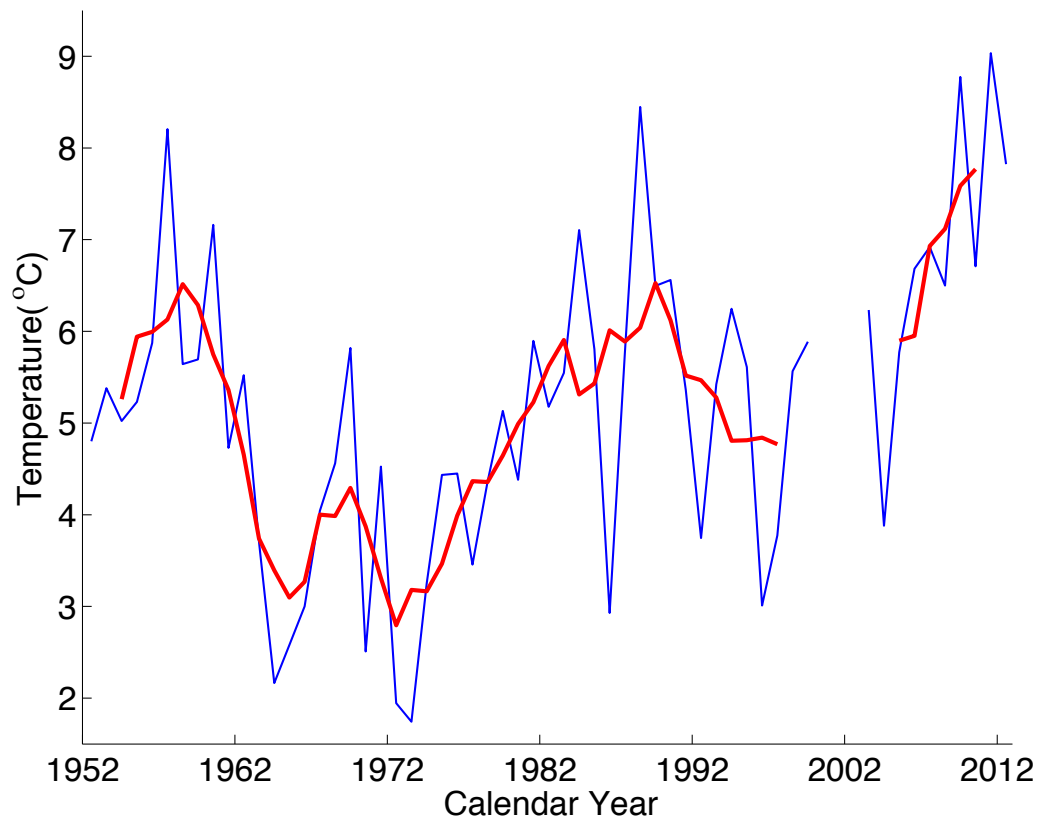

**Supplement Figure 3:** Seasonal patterns of  $R_{eco}$  in bare (a,b,c) and vegetated areas (d,e,f) under control and experimental treatments conditions (+2, +4°C, +4°C×W, W) (average±SE, n=1-3 plots) during the summers of 2010-2012.

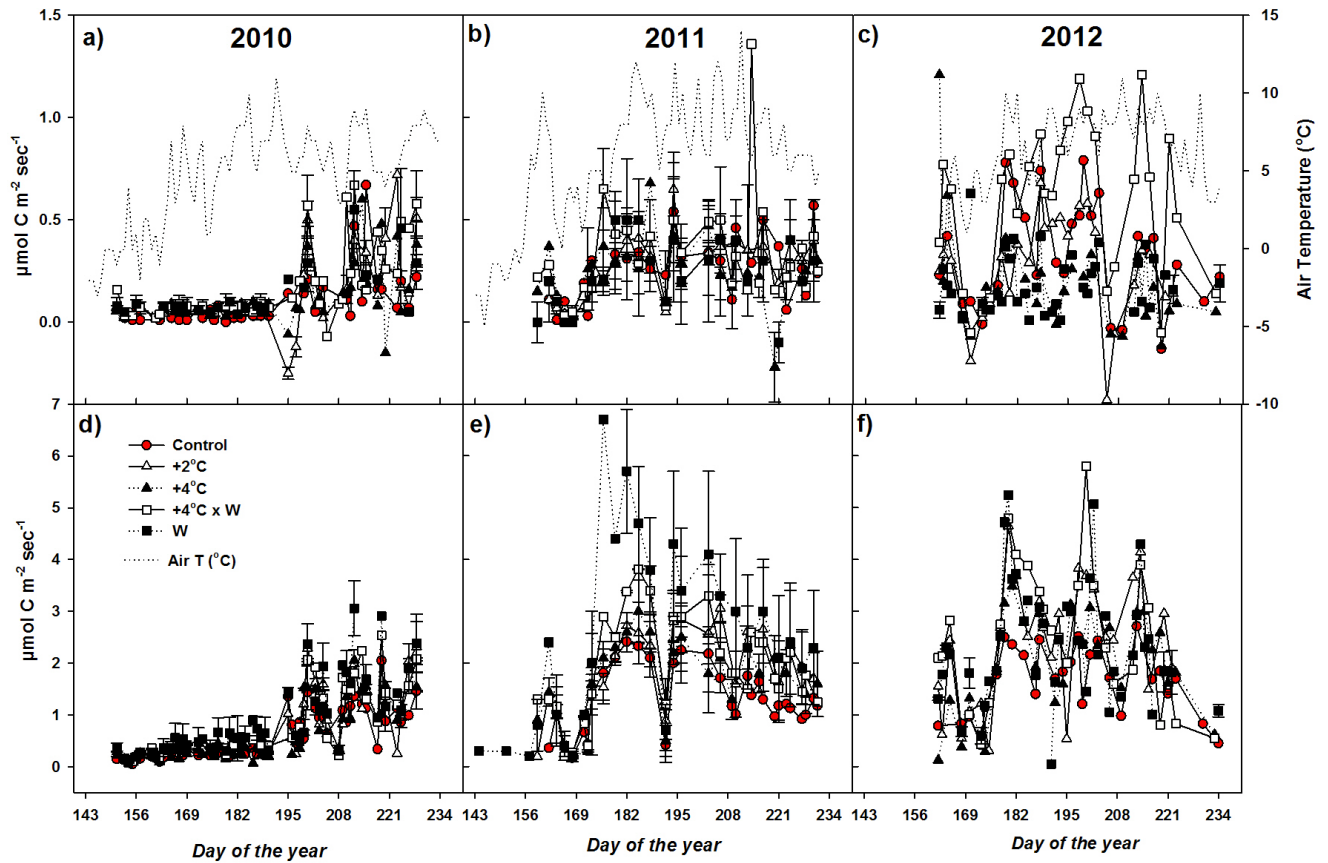

**Supplement Figure 4:** Correlation between daily  $R_{eco}$  flux and soil temperature at 5 cm depth measured manually during the flux measurement for the control and treatments plots (+2°C, +4°C, +4°C × W and W).

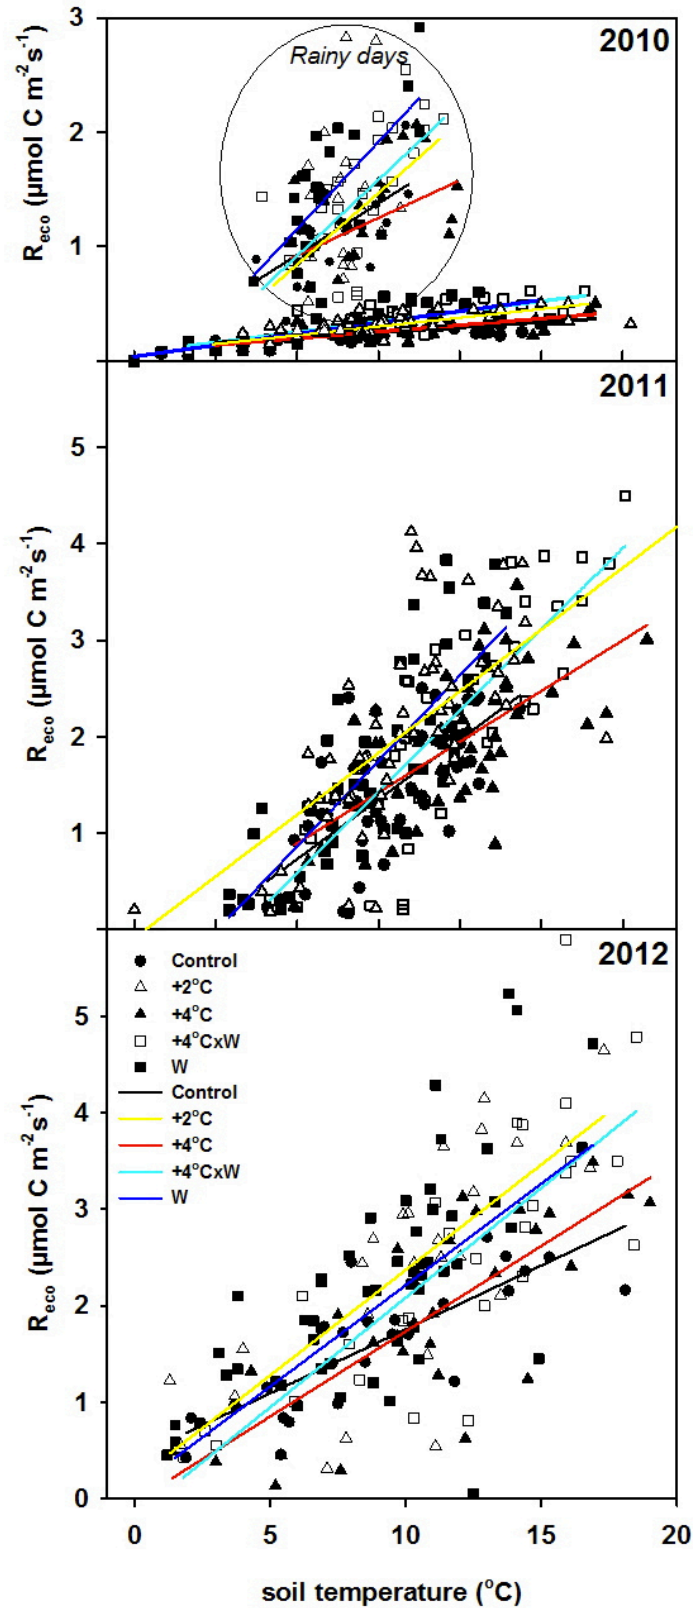

**Supplement Figure 5:** Pore space CO<sub>2</sub> concentration along the soil profile before and 1, 3, 6, 8, 12 and 24 hrs after water irrigation in vegetated and rocky areas [legend in the veg. area apply also to the rocky ones].

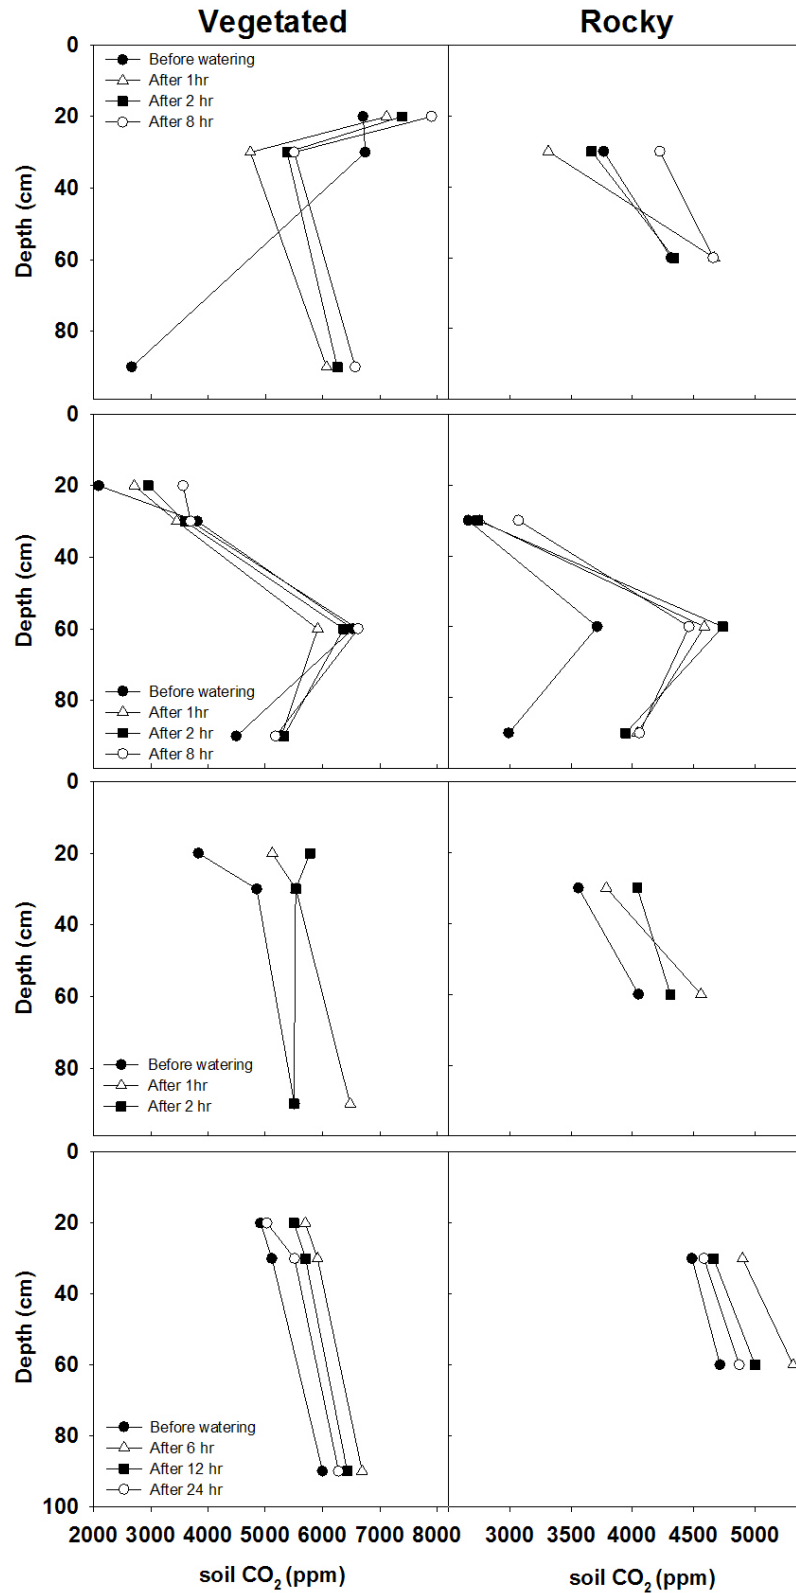

Supplement: Supplementary file 1 [file bg-11-4289-2014-supplement.pdf]
